# Supplementary material
Source: publisher figshare collection journal article supplement (https://acs.figshare.com/ndownloader/files/4575991)
Supplement: Supplementary file 1 [file 4575991]

# Superoleophobic Cotton Textiles

Boxun Leng,<sup>1,2</sup> Zhengzhong Shao,<sup>\*2</sup> Gijsbertus de With,<sup>1</sup> Weihua Ming<sup>\*1,3</sup>

## Supporting information

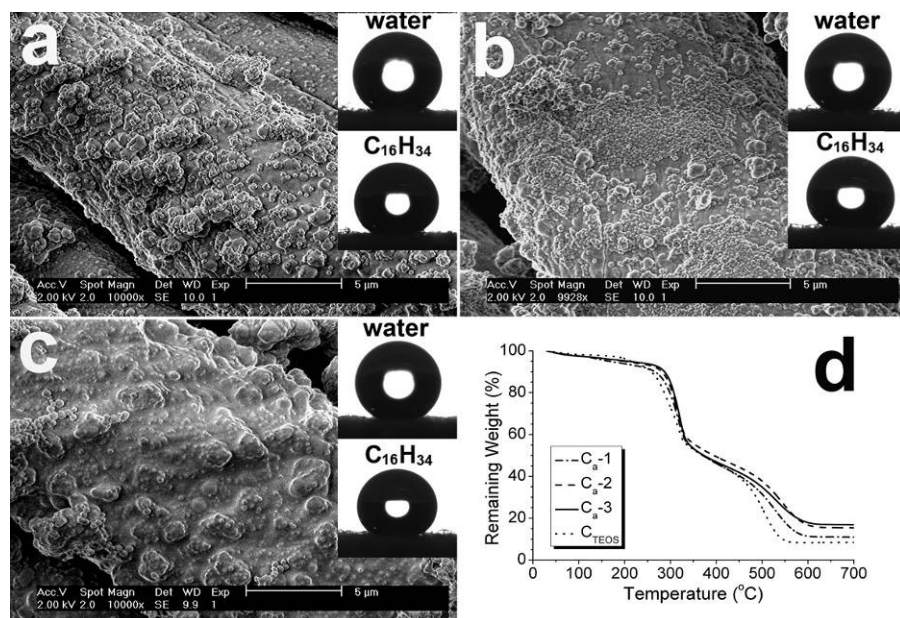

Figure S1. The morphology of C<sub>a</sub> samples: (a) C<sub>a</sub>-1 (b) C<sub>a</sub>-2 (c) C<sub>a</sub>-3, and (d) weight loss for the cotton textile samples (C<sub>a</sub> series) before and after each step of the modification by TGA. Shown in the inserts are the images of static water droplets (5 μL) and C<sub>16</sub>H<sub>34</sub> droplets (5 μL) on the respective textiles modified by Rf-Si, namely (a) C<sub>a</sub>-1-Rf, (b) C<sub>a</sub>-2-Rf, and (c) C<sub>a</sub>-3-Rf.
